# Supplementary material
Source: PubMed Central journal article supplement (PMC7358755)

## Supplemental Material: Tables and Figures

Krett JD, Jewett GA, Elton-Lacasse C, Fonseca F, Hahn C, Au S, Koch MW. Hemorrhagic Encephalopathy Associated with COVID-19.

**Table S1**

Standard cerebrospinal fluid (CSF) results from day 1 and day 14.

| Value                    | Units               | Day 1    | Interpretation   | Day 14   | Interpretation                      |
|--------------------------|---------------------|----------|------------------|----------|-------------------------------------|
| <b>WBC</b>               | x10 <sup>6</sup> /L | 2        | Normal           | 3        | Normal                              |
| <b>RBC</b>               | x10 <sup>6</sup> /L | 0        | Normal           | 668      | High                                |
| <b>Xanthochromia</b>     | --                  | Absent   | Normal           | Present  | Consistent with hemorrhages         |
| <b>Protein</b>           | g/l                 | 0.94     | High             | 0.67     | High                                |
| <b>Glucose</b>           | mmol/l              | 6.1      | Serum value: 8.3 | 5.4      | Serum value: 11.1                   |
| <b>Opening Pressure</b>  | cmH <sub>2</sub> O  | 19       | Normal           | 16       | Normal                              |
| <b>HSV/VZV DNA</b>       | PCR                 | Negative | --               | Negative | --                                  |
| <b>Enterovirus RNA</b>   | PCR                 | Negative | --               | Negative | --                                  |
| <b>Bacterial Culture</b> | --                  | Negative | --               | Negative | --                                  |
| <b>COVID-19 RNA</b>      | PCR                 | --       | --               | Negative | --                                  |
| <b>Oligoclonal Bands</b> | --                  | --       | --               | Present  | Matched with bands present in serum |
| <b>AMPA Ab</b>           | --                  | --       | --               | Negative | Identical to serum results          |
| <b>NMDA Ab</b>           | --                  | --       | --               | Negative | Identical to serum results          |
| <b>VGKC Ab</b>           | --                  | --       | --               | Negative | Identical to serum results          |
| <b>DPPX Ab</b>           | --                  | --       | --               | Negative | Identical to serum results          |
| <b>GABABR Ab</b>         | --                  | --       | --               | Negative | Identical to serum results          |

**Krett JD, Jewett GA, Elton-Lacasse C, Fonseca F, Hahn C, Au S, Koch MW. Hemorrhagic Encephalopathy Associated with COVID-19.**

HSV = herpes simplex virus; VZV = varicella zoster virus; AMPAR =  $\alpha$ -amino-3-hydroxy-5-methyl-4-isoxazolepropionic acid receptor; NMDA-R = N-Methyl-d-aspartate receptor; VGKC = voltage-gated potassium channel; DPPX = dipeptidyl-peptidase-like-protein-6; GABABR = gamma aminobutyric acid B receptor; Ab = antibody.

**Table S2**

|                 | 95% Range (pg/ml) |       | Median (pg/ml) | Inter-quartile range (pg/ml) |       | St. Dev. (pg/ml) |
|-----------------|-------------------|-------|----------------|------------------------------|-------|------------------|
| <b>sCD30</b>    | 0                 | 27.7  | 2.5            | 0                            | 6.1   | 37.2             |
| <b>sEGFR</b>    | 1852              | 7958  | 3804           | 2789                         | 4743  | 1806.9           |
| <b>sgp130</b>   | 15224             | 62771 | 30621          | 22769                        | 37296 | 16623.8          |
| <b>sIL-1RI</b>  | 0                 | 15.2  | 3.2            | 1.6                          | 5.7   | 61.9             |
| <b>sIL-1RII</b> | 0                 | 364   | 21.1           | 0                            | 54.5  | 151.1            |
| <b>sIL-2Ra</b>  | 0                 | 240   | 7.2            | 2.0                          | 18.9  | 182.4            |
| <b>sIL-4R</b>   | 0                 | 35.2  | 5.4            | 2.2                          | 9.3   | 24.0             |
| <b>sIL-6R</b>   | 396               | 1553  | 825            | 643                          | 1016  | 470.8            |
| <b>sRAGE</b>    | 0                 | 4.1   | 1.0            | 0                            | 2.5   | 11.1             |
| <b>sTNFR1</b>   | 253               | 1309  | 495            | 388                          | 704   | 511.7            |
| <b>sTNFR2</b>   | 308               | 2760  | 665            | 495                          | 1048  | 1400.4           |
| <b>sVEGFR1</b>  | 0                 | 286.7 | 25.7           | 0                            | 70.3  | 441.0            |
| <b>sVEGFR2</b>  | 388               | 2102  | 812            | 638                          | 1086  | 2375.6           |
| <b>sVEGFR3</b>  | 0                 | 65.1  | 7.9            | 0                            | 17.4  | 182.6            |

5%                      95% Percentile                      25%                      75% Percentile

Human Soluble Cytokine Receptor Panel (MILLIPLEX® assay, EMD MilliporeSigma). 95% Range depicts the 5<sup>th</sup> and 95<sup>th</sup> percentile based on the normal distribution provided by Eve Technologies, Calgary, Alberta, Canada. Likewise, interquartile range values and standard deviations are depicted. This distribution is derived from 124 patient CSF samples submitted to the laboratory (22 for research use, 102 for experimental clinical diagnostic use).

Krett JD, Jewett GA, Elton-Lacasse C, Fonseca F, Hahn C, Au S, Koch MW. Hemorrhagic Encephalopathy Associated with COVID-19.

**Figure S1**

**Cranial CT angiography on day 15.** Sagittal (B) and axial (C) images demonstrate no vascular stenoses, occlusions, or alternative sources for the hemorrhages seen on MRI.

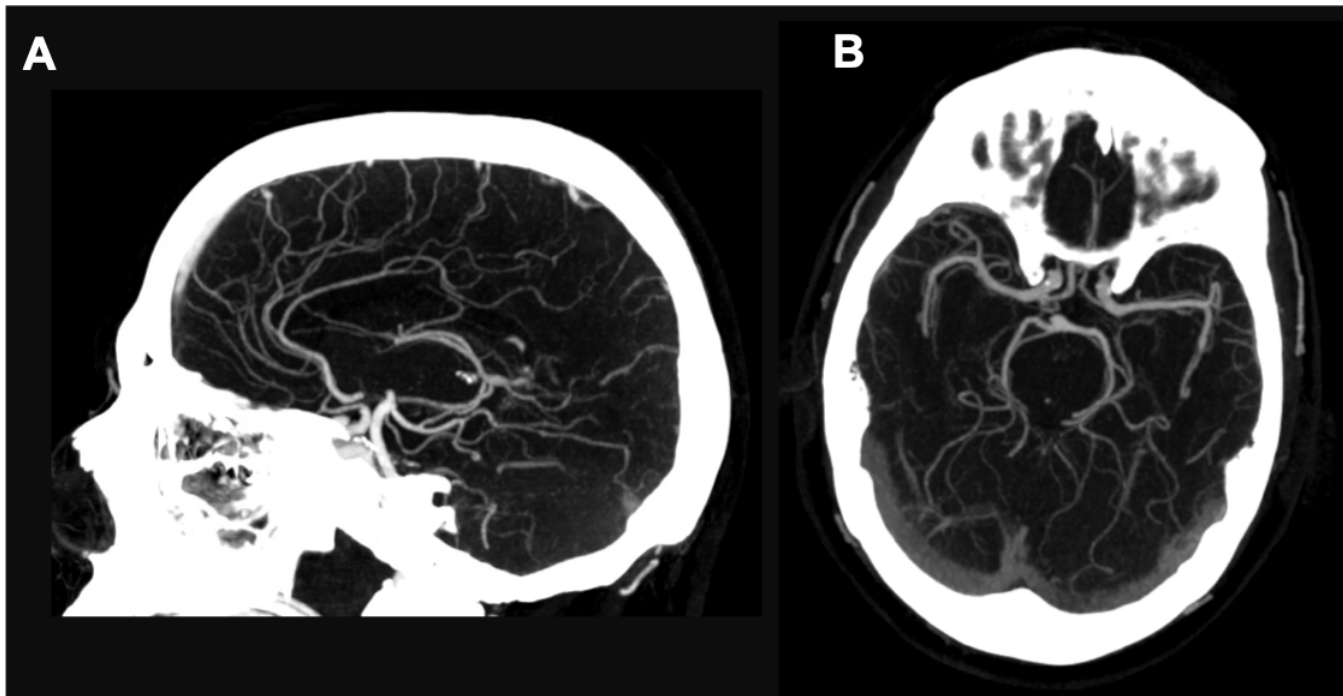

**Krett JD, Jewett GA, Elton-Lacasse C, Fonseca F, Hahn C, Au S, Koch MW. Hemorrhagic Encephalopathy Associated with COVID-19.**

**Figure S2**

**MRI brain on day 21.** Axial fluid-attenuated inversion recovery (FLAIR) [A-B] and susceptibility-weighted images (SWI) [C-D] re-demonstrate multifocal hemorrhages with mild surrounding vasogenic edema. Evolution of the hemorrhages, including changes in signal characteristics, are consistent with the expected temporal evolution. Gadolinium enhancement continues to be absent.

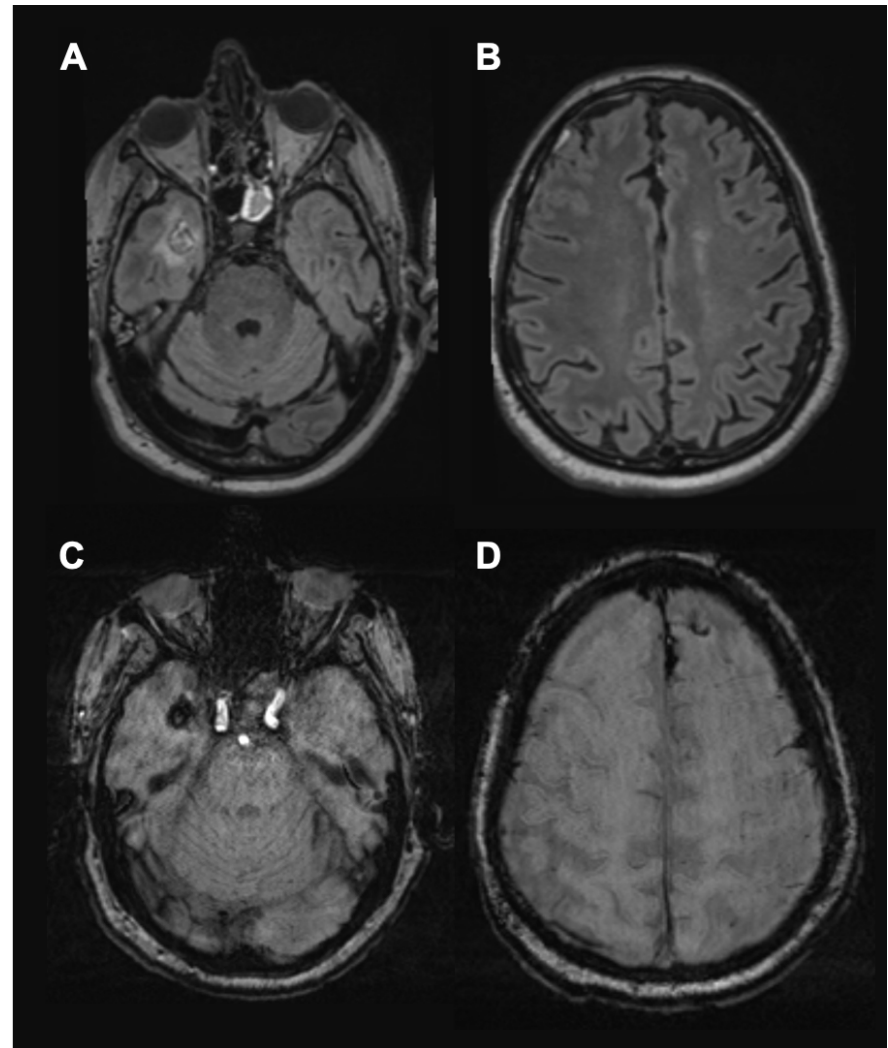

Supplement: mmc1.pdf [file mmc1.pdf]
